# Supplementary material
Source: PubMed Central journal article supplement (PMC2878003)
Supplement: supp_M109.090282_jbc.M109.090282-1.pdf [file supp_M109.090282_jbc.M109.090282-1.pdf]

# THE *DROSOPHILA* COPPER TRANSPORTER CTR1C FUNCTIONS IN MALE FERTILITY

Dominik Steiger, Michael Fetchko, Alla Vardanyan, Lilit Atanesyan, Kurt Steiner, Michelle L. Turski, Dennis J. Thiele, Oleg Georgiev and Walter Schaffner

## Supplementary Information

### Supplementary Figure and Table Legends

#### Supplementary Figure 1

Indicated are the proportions of test crosses with offspring numbers of 0, 1-50, 51-100 and <100 for the genotypes whose average offspring numbers are shown in Figure 4C.

#### Supplementary Figure 2

Clustal W2 protein sequence alignments of the insect Ctr1 genes. **A:** Alignment of human Ctr1 and *Drosophila melanogaster* Ctr1A, Ctr1B and Ctr1C. **B:** Alignment of drosophilid Ctr1A genes. **C:** Alignment of human Ctr1 and insect Ctr1A genes (of the drosophilid Ctr1A genes, only *Drosophila melanogaster* Ctr1A is shown). **D:** Alignment of drosophilid Ctr1B genes. **E:** Alignment of insect Ctr1B genes (of the drosophilid Ctr1B genes, only *Drosophila melanogaster* Ctr1B is shown). **F and G:** Alignment of drosophilid Ctr1C genes.

Red vertical lines denote exon-exon junctions. Gray vertical lines in the Ctr1C alignments denote splice sites of coding introns. The three transmembrane domains are indicated in yellow (based on the Uniprot annotation of human Ctr1 (entry: O15431)). Clustal W2 amino acid color code: red: small and hydrophobic (including aromatic, excluding Y) amino acids, blue: the acidic amino acids D and E, magenta: the basic amino acids R and K, green: hydroxyl, amine and basic amino acids, excluding Q. Consensus symbols: " \* " amino acids identical in all sequences in the alignment. " : " conserved substitutions. " . " semi-conserved substitutions.

#### Supplementary Table 1

Gene location and synteny of the drosophilid Ctr1 genes. Indicated are the scaffold or chromosomal locations of the drosophilid Ctr1A, Ctr1B and Ctr1C genes. The arrangement of genes flanking the Ctr1 genes is shown (genes within 50 kb on each side of Ctr1A and Ctr1B, genes within 100 kb on each side of Ctr1C). Homologous genes (as identified by BLAST searches) have matching colors.

## Supplementary Data

### Fly Genotypes

Figure 1A:

Ctrl1A (AttP51D): *y w; UAS-Ctrl1A[AttP51D]/actin-GAL4; +*. Ctrl1B: *y w; UAS-Ctrl1B[AS24e]/actin-GAL4; +*. Ctrl1C (AttP51D): *y w; UAS-Ctrl1C[AttP51D]/actin-GAL4; +*. Ctrl1C (C34): *y w; UAS-Ctrl1C[C34]/actin-GAL4; +*.

Figure 1B:

GFP: *y w; UAS-GFP/actin-GAL4; +*. Ctrl1C (D19): *y w; UAS-Ctrl1C[D19]/actin-GAL4; +*.

Figure 1C:

Ctrl1A (AttP51D): *y w; UAS-Ctrl1A[AttP51D]/GMR-GAL4; +*. Ctrl1B: *y w; UAS-Ctrl1B[AS24e]/+; GMR-GAL4/+*. Ctrl1C (AttP51D): *y w; UAS-Ctrl1C[AttP51D]/GMR-GAL4; +*. Ctrl1C (C34): *y w; UAS-Ctrl1C[C34]/+; GMR-GAL4/+*.

Figure 1D:

GFP: *y w; UAS-GFP/GMR-GAL4; +*. Ctrl1C (D22): *y w; UAS-Ctrl1C[D22]/+; GMR-GAL4/+*.

Figure 1E:

*w Ctrl1A<sup>25</sup>/Y; UAS-Ctrl1A[AttP51D]/+; tubulin-GAL4/+* and *w Ctrl1A<sup>25</sup>/Y; UAS-Ctrl1A[AttP51D]/+; MKRS/+*. *w Ctrl1A<sup>25</sup>/Y; UAS-Ctrl1C[D19]/+; tubulin-GAL4/+* and *w Ctrl1A<sup>25</sup>/Y; UAS-Ctrl1C[D19]/+; MKRS/+*. *w Ctrl1A<sup>25</sup>/Y; UAS-Ctrl1C[D28]/+; tubulin-GAL4/+* and *w Ctrl1A<sup>25</sup>/Y; UAS-Ctrl1C[D28]/+; MKRS/+*.

Figures 2A and 2B:

*y w hs-flp/[y w or Y]; UAS-Ctrl1C[AttP51D]/+; actin>CD2>GAL4 UAS-GFP/+* (" $>$ " designating FRT sites).

Figures 2C and 2D:

*y w hs-flp/[y w or Y]; UAS-Ctrl1C-FLAG/+; actin>CD2>GAL4 UAS-GFP/+*.

Figures 3B and 3C:

*y w; +; Ctrl1C<sup>6D</sup>*.

Figure 4A:

Control: *y w. Ctrl1C<sup>6D</sup>: y w; +; Ctrl1C<sup>6D</sup>. Ctrl1B<sup>3-4</sup>: w; +; Ctrl1B<sup>3-4</sup>. Ctrl1B<sup>3-4</sup> Ctrl1C<sup>6D</sup>: y w; +; Ctrl1B<sup>3-4</sup> Ctrl1C<sup>6D</sup>*.

Figure 4B:

Control: *y w. Ctrl1B-GFP<sup>genomic</sup> Ctrl1B<sup>3-4</sup> Ctrl1C<sup>6D</sup>: y w; Ctrl1B-GFP<sup>genomic</sup> [AH3b]/+; Ctrl1B<sup>3-4</sup> Ctrl1C<sup>6D</sup>. Ctrl1C<sup>genomic</sup> Ctrl1B<sup>3-4</sup> Ctrl1C<sup>6D</sup>: y w; Ctrl1C<sup>genomic</sup> [D5]/+; Ctrl1B<sup>3-4</sup> Ctrl1C<sup>6D</sup>. Ctrl1B<sup>3-4</sup> Ctrl1C<sup>6D</sup>: y w; +; Ctrl1B<sup>3-4</sup> Ctrl1C<sup>6D</sup>*.

Figure 4C:

Control: *y w; [AttP51D]/[[AttP51D] or CyO, y<sup>+</sup>]; Ctrl1B<sup>3-4</sup> Ctrl1C<sup>6D</sup>/TM6B. Ctrl1C-GFP<sup>genomic</sup> Ctrl1B<sup>3-4</sup> Ctrl1C<sup>6D</sup>: y w; Ctrl1C-GFP<sup>genomic</sup> [AttP51D]/[Ctrl1C-GFP<sup>genomic</sup> [AttP51D] or CyO, y<sup>+</sup>]; Ctrl1B<sup>3-4</sup> Ctrl1C<sup>6D</sup>. Ctrl1B<sup>3-4</sup> Ctrl1C<sup>6D</sup>: y w; [AttP51D]/CyO, y<sup>+</sup>; Ctrl1B<sup>3-4</sup> Ctrl1C<sup>6D</sup>*.

Figure 5A:

*y w; Ctrl1C-GFP<sup>genomic</sup> [AttP51D]*.

Figures 5B and 5C:

Control: *y w*; [*AttP51D*]; +. *CtrlC-GFP<sup>genomic</sup>*: *y w*; *CtrlC-GFP<sup>genomic</sup>* [*AttP51D*]; +.

Figure 6A:

Control: *y w/Y*; [*AttP51D*]/+; +. *CtrlC-GFP<sup>genomic</sup>* (*AttP2A*): *y w CtrlC-GFP<sup>genomic</sup>* [*AttP2A*]/*Y*; +; +. *CtrlC-GFP<sup>genomic</sup>* (*AttP51D*): *y w/Y*; *CtrlC-GFP<sup>genomic</sup>* [*AttP51D*]/+; +. *CtrlC-GFP<sup>genomic</sup>* (*AttP86Fb*): *y w/Y*; +; *CtrlC-GFP<sup>genomic</sup>* [*AttP86Fb*]/+. Figure 6B: *y w*; *UAS-lacZ* [*AttP51D*]/*armadillo-GAL4*; +. *y w*; *armadillo-GAL4*/+; *UAS-lacZ* [*AttP86Fb*]/+. *y w UAS-lacZ* [*AttP2A*]/*y w*; *armadillo-GAL4*/+; +. *y w*; *UAS-lacZ* [*AttP51D*]; +. *y w*; +; *UAS-lacZ* [*AttP86Fb*]. *y w UAS-lacZ* [*AttP2A*]; +; +. *y w*.

## Insect *Ctrl1* protein sequences

Species abbreviations

|       |                                   |
|-------|-----------------------------------|
| D_mel | <i>Drosophila melanogaster</i>    |
| D_ana | <i>Drosophila ananassae</i>       |
| D_ere | <i>Drosophila erecta</i>          |
| D_gri | <i>Drosophila grimshawi</i>       |
| D_moj | <i>Drosophila mojavensis</i>      |
| D_per | <i>Drosophila persimilis</i>      |
| D_pse | <i>Drosophila pseudoobscura</i>   |
| D_sec | <i>Drosophila sechellia</i>       |
| D_sim | <i>Drosophila simulans</i>        |
| D_vir | <i>Drosophila virilis</i>         |
| D_wil | <i>Drosophila wilsoni</i>         |
| D_yak | <i>Drosophila yakuba</i>          |
| A_aeg | <i>Aedes aegypti</i>              |
| A_gam | <i>Aedes gambiae</i>              |
| A_mel | <i>Apis mellifera</i>             |
| A_pis | <i>Acyrtosiphon pisum</i>         |
| B_mor | <i>Bombyx mori</i>                |
| C_pip | <i>Culex pipiens</i>              |
| N_vit | <i>Nasonia vitripennis</i>        |
| P_hum | <i>Pediculus humanus corporis</i> |
| T_cas | <i>Tribolium castaneum</i>        |

Drosophilids: *Ctrl1A* homologs, protein sequences

```
>D_mel_Ctrl1A
MDHAHHSAPGVDHSMHHDHVGMMHHDHSGIPAATASPMDAASMFDLIPDTS DLQASHAGHAAH
GAHNHGGGSGTGMEHMMPMAFHFGYNETILFSWWHIETVAGLIGSMIAIFLLALMYEGLKYR
EYLFWKTYNLLERYPVTGPQRNPEAPRIPSPAAAAPSPVQYVGEVVHKQPPSMLSINHLLQTLH
VLQVTL SFLMLIFMTYNVWLCLMVVLGAAVGYFLFCWKKSIVVDVTEHCH
```

>D\_ana\_GF22272\_[Ctr1A]

MDHAHHNTGGVDHSMHHDHHPGMHHDHMSAAVATATTEDPAAILAPLFTGTSDVLQAAADV  
HAGHHAGHHGGSGTGMEHMMPMAFHFGYNETILFSWWHIETVAGLVGSMIAIFVLALLYEGLK  
YYREYLFWKTYNLLLEYPVTPGQRNPEAPRLPSPAAAAPSPVQYVGEVVHKQPPSMLSFNHLQ  
TLLHVLQVTLFLLMLIFMTYNVWLCLMVVLGAGVGYFLFCWKKSVIVDVTEHCH

>D\_ere\_GG19602\_[Ctr1A]

MDHTHHSAPDVDHSMHHDHAGMHHDHSGMAAATASPLDPASMLDLIPQTSDLQASHTGHVGH  
GAHNHGGGSGTGMEHMMPMAFHFGHNETILFSWWHIETVAGLVGSMIVIFLLALMYEGLKYY  
REYLFWKTYNLLLEYPVTPGQRNPEAPRIPSPAAAAPSPVQYVGEVVHKQPPSMLSVNHLQTL  
LHVLQVTLFLLMLIFMTYNVWLCLMVVLGAAVGYFLFCWKKSVIVDVTEHCH

>D\_gri\_GH24714\_[Ctr1A]

MDAHAHHSAPSIGVDHSMHGHDHAGMHHDHAHMAPMDTTTSPPLETSHGDMGMGGHSSH  
HGSGGTGHGMEHMMSMAFHFGYDETILFSWWHIETVAGLIGSMIAIFLLALLYEGLKYYREYLF  
WKTYNLLLEYPVTPGQRNPEAPRLPPPSAAAAPSPVQYVGEVVHKQPPTMLSINHLQYQTLQVL  
QVTLFLLMLIFMTYNVWLCMMVVLGSGVGYFLFCWKKSVIVDVTEHCH

>D\_moj\_GI21812\_[Ctr1A]

MDPHAHHPNAPVDHSMHGHDHANMHHDHDMGLDATTLPPLATTHGDLPMTHAGHHHG  
GGGTGTGMEHMMSMAFHFGYDETILFSWWHIDTVAGLIGSMIAIFLLALLYEGLKYYREYLF  
KTYNLLLEYPVTPGQRNPEAPRLPTPAAAAPSPVQYVGEVVHKQPPTMLSINHLQYQTLHVLQV  
TLFLLMLIFMTYNVWLCMMVVLGAGVGYFLFCWKKSVIVDVTEHCH

>D\_per\_GL13345\_[Ctr1A]

MDHAHTAPNVDSLHHDHAGMHHDHSGMDSSISPTTTTTDSTTHDMHAVHHHSGGGGGTGT  
GMEHMMSMAFHFGYNETILFSWWHIDTVSGLIGSMIAIFLLALLYEGLKYYREYLFWKTYNLL  
YRPVTPGQRNPEAPRLPSAAAAAPSPVQYVGEVVHKQPPSMLSVNHLQYQTLHILQVTLFLL  
LIFMTYNVWLCLMVVLGAAVGYFLFCWKKSVIVDVTEHCH

>D\_pse\_GA17816\_[Ctr1A]

MDHAHTAPNVDSLHHDHAGMHHDHSGMDSSISPTTTTTDSTTHDMHAVHHHSGGGGGTGT  
GMEHMMSMAFHFGYNETILFSWWHIDTVSGLIGSMIAIFLLALLYEGLKYYREYLFWKTYNLL  
YRPVTPGQRNPEAPRLPSAAAAAPSPVQYVGEVVHKQPPSMLSVNHLQYQTLHILQVTLFLL  
LIFMTYNVWLCLMVVLGAAVGYFLFCWKKSVIVDVTEHCH

>D\_sec\_GM12509\_[Ctr1A]

MDHAHHSAPGVDHSMHHDHAGMHHDHSGIAAATASPMDAASMFDLIPDTSDLQASHAGHAA  
HGAHNHGGGSGTGMEHMMPMAFHFGYNETILFSWWHIETVAGLVGSMIAIFLLALMYEGLKY  
YREYLFWKTYNLLLEYPVTPGQRNPEAPRIPSPAAAAPSPVQYVGEVVHKQPPSMLSVNHLQTL  
LHVLQVTLFLLMLIFMTYNVWLCLMVVLGAAVGYFLFCWKKSVIVDVTEHCH

>D\_sim\_GD16812\_[Ctr1A]

MDHAHHSAPGVDHSMHHDHAGMHHDHSGLAAATASPM DAGSMFDLIPDTSDLQASHAGHAA  
HGAHNHGGGSGTGMEHMMPMAFHFGYNETILFSWWHIETVAGLVGSMIAIFLLALMYEGLKY  
YREYLFWKTYNLLLEYPVTPGQRNPEAPRIPSPAAAAPSPVQYVGEVVHKQPPSMLSVNHLQTL  
LHVLQVTLFLLMLIFMTYNVWLCLMVVLGAAVGYFLFCWKKSVIVDVTEHCH

>D\_vir\_GJ16985\_[Ctr1A]

MDAHAHHSAPNVELIDHSMHGHDHANMHHDHEHMGLDATTLPPLATPHGDLAMGMHAGHH  
HGGGGGGTGTGMEHMMSMAFHFGYNETILFSWWHIETVAGLIGSMIAIFLLALLYEGLKYYR  
EYLFWKTYNLLLEYPVTPGQRNPEAPRLPTPAAHAAPSPVQYVGEVVHKQPPTMLSINHLQYQTL  
LHVLQVTLFLLMLIFMTYNVWLCMMVVLGAGVGYFLFCWKKSVIVDVTEHCH

>D\_wil\_GK25589\_[Ctr1A]

MDHHNHGAPAVETIDHSMHHGHAGMHHDHSGLSGTVTDPTVLASDISATTPMSMGMQHGAG  
HYHGGGTGTGMEHMMSMAFHFGYNETILFSWWHIDTVAGLIGSMIAIFLLALLYEGLKYYREY  
LFWKTYNLLYRVPVTGPQRNPEAPRLPSPAAAAPSPVQYVGEVVHKQPPSMLSLNHLFQTLLHIL  
QVTLFLLMLIFMTYNVWLCLMVVLGAAIGYFLFCWKKSVIVDVTEHCH

>D\_yak\_GE16762\_[Ctr1A]

MDHAHHSAPGVDHSMHHDHAGMHHDHSGMAASTASPSDSASMFDLIPDTSDLQASHAGHGAH  
NHGGGSGTGMKHMMPMAFHFGYDETILFSWWHIETVAGLVGSMIAIFLLALMYEGLKYYREYL  
FWKTYNLLYRVPVTGPQRNPEAPRIPSPAAAAPSPVQYVGEVVHKQPPSMLSVNHLQLTLLHVL  
QVTLFLLMLIFMTYNVWLCLMVVLGAAVGYFLFCWKKSVIVDVTEHCH

Non-drosophilid insects: Ctr1A homologs, protein sequences

>A\_aeg\_AAEL013309\_[Ctr1A]

MDHSEHHDYSHQMNHSSDADMMHHGHEGHHGSMEHSLQDHTMDQGASAHAAAGHSGHAG  
MVHHMMSMAFHGGYNETILFEQWKIDSLSGLLWSMLLIFIMAALYEGLKYYREHLFWKTYNAL  
QYRPVTVTEKSPGNGNVANNGLAANGSGDEASRVVHMGVEVIHKQPRPTMLSTMHLFQTFLH  
ILQVTLFLLMLIFMTYNTWLCIAVVLGAALGYFLFGWKKSVIVDVTEHCH

>A\_gam\_AGAP002109\_[Ctr1A]

MDHSEHHDYSQHANMSSGGAHAGHTGHGTVDHSAHDHTMMDHGAHDHHHGAAGGMGAAS  
PAGMVHHMMSMSFHGGYDETILFEQWKIDSLSGLLWSMLLIFVMAALYEGLKYYREHLFWRT  
YNALQYRPVTVTEKSNNGVTVAGGTATDDRAGGAGVGDGLNGASGTGTSAEEGARIVHMGV  
EVIHKQPPTMLSLMHLFQTLLHILQVTLFLLMLIFMTYNTWLCIAVVLGAALGYFLFGWKKSVI  
VDV

>C\_pip\_CPIJ018594\_[Ctr1A]

MDHSEHHDYSQHMLMNHSGAGSGAGMHDHSDHSGMEHSLQDHTMNSGGVATGHGGHGHG  
HGAASSGGMEGMVHHMIMVGEVIHKQPRPTMLSMHLFQTFLHIVQVTLFLLMLIFMTYNTW  
LCLAVVLGAALGYFLFGWKKSVIVDVTEHCH

>A\_pis\_LOC100165693\_[Ctr1A]

MSHDHNNHNHQAIEHQHPTESSDSCSGSEAPASSGQHMMHHMMSMSFHFGTNETVLFDDWW  
TFSTTGLVYSMIGIFLMATLYEGLKYFREYLFWKSYNAIQYRSVQIPLEKGPNDPVSQMVGKVL  
LKQPLPTMFSLTHLLQTFLHIVQISISYLLMLIFMTYNVWLCLAVLFGATLGYFLFGWKKSVVVD  
VTEHCH

>B\_mor\_LOC692872\_[Ctr1A]

MDEHHEHNNMDMGHAGHEHHGIDHSRHHGQMPINGLLNSSYNRIVHNTDMNDHNVHTFSGH  
GDHSSHNMGMSMTFHGGYIETILFSWWNVTEVGEFVGSFFAIFIALLYEGLKYYRKHLLWKTY  
AGLQYCAVAPPDKGVANICAADPEPIVQPIPHMLERNVPTMMSTAHAWQTILHGVQVLVSYS  
MLVFMTYNTWLCIAVVLGSATGYFLFGWRESVVVDFTEHCH

>P\_hum\_PHUM339810\_[Ctr1A]

MDHAGHGVSHGDSHVGPVPHGGDTSRMGPPSHGVSSHVDHASHNHIIHETNDSHNGSHCHG  
MSMEFHFGYTETILFSTWKIDSVGGLIGSMFGIVLLAALYEGLKYYREYLFWKTYSNLQYKSVRF  
PGDKVVESSSDGNKIVHLVGEVIHKQPPSMWNLMHGYQTFLQAVQMVLSYFLMLIFMTYNVW  
LCTAVVLGATIGYFLFGWKKSVVVDVTEHCH

>A\_mel\_LOC551217\_[Ctr1A]

MSHNHMAHMMNATNGHSAHGIIHASHQAIDHLNMHGNNMHSMDHANMDHGSHLTSDTNPCA  
NMGMHGMSTMWFHGGYCEHVLFEVWFKITSISGLIGSMVGMIMAAALYEGLKYYREYLFWKMY  
NSLQYRSVTMPQEKNVVAEDNRVVMVGEVIHKQPPTMLSWMHTFQTCLHIVQIVLSYFLMLIF  
MTYNVWLCFAVVLGAAIGYFLFGWKKSIVVDVTEHCH

>N\_vit\_LOC100122867\_[Ctr1A]

MAHHDHMAHMMAMNTSGSPDMTGMDHMDHGHMANTNHHMDHGSMASHDHGSAQGSSDAC  
SAMSHAMHGMSMAFHGGYCEKILFETWQISSVAGLIGSVIGIVIMSALYEGLKYYREYLFWKTY  
NALQYRSVSMPQEKNVVDNDRVVMVGEVIHKQPPTMLSWMHAFQTLLHIIQIILSYFLMLIF  
MTYNSWLCAGVVLGAAIGYFLFGWKKSIVVDVTEHCH

>T\_cas\_LOC660576\_[Ctr1A]

MEHNNHDMHEPLDHNMHQGMGHMGHDMGGTTPKHDMMSHMMSMAFHTGYNETVLFQDQ  
WKFTIGGLIGSMIGIFFMAALYEGLKYYREYLFWKTYNALQYRAVTLPEKGVVSEDNQIVHNV  
GEVIHKQPPTMLSGMHFYQTLHMIQMVLSYFLMLIFMTYNVWLCCLAVVIGAGVGYFLFGWKK  
SVIVDVTEHCH

Drosophilids: Ctr1B homologs, protein sequences

>D\_mel\_Ctr1B

MDHGSDSTSTAKSCPMIMVFHAGHCERILWRGWVASTVTEFVLSALAIFLVSFLYEALKFLRQ  
QLARREARRASEQLAAEQRRKNEAPAAGGCCSEAPLAEPREQTYWQRLFASSHIVQSLNLLQI  
VISYLLMLIFMTFNYWLCLAVILGLGLGYFFFGWNKKNPDESECCP

>D\_ana\_GF18342\_[Ctr1B]

MDLMAMDHDHDHGTSDDDDTTKSCPMIMVFHGGHCERILWRGWVAYTVTEFVLSALAIFFVS  
FLYEALKFLRQHLARRDARKESERLAEEQRRKNENPTAGGCCSETPLAEERDPSYWQRLFASHTI  
IQALLNLVQIVISYLLMLIFMTFNYWLCLAVILGLGLGYFFFGWNKKSPPDESECCP

>D\_ere\_GG25028\_[Ctr1B]

MDHNHDHGSDSTSTAKSCPMIMVFHAGHCERILWRGWVASTVTEFVLSALAIFLVSFLYEALK  
FLRQQLARREARKESEQLASEQRRKNEVPAAGGCCSETPLAEPKEQTYWQRLFASSTMVQSLN  
LLQIVISYLLMLIFMTFNYWLCLAVILGLGLGYFFFGWNKKNPDESECCP

>D\_gri\_GH14206\_[Ctr1B]

MDHGSGGTTAKSCPMIMVFHGGHCERILWRGWVASTVVEFTFSAIAFFVLAFFIYELLKFLRNYLL  
QREARKVAEQTAAEIRRKREINDCAGCSETPLAEIREETYWQRIFNSAHIIQSLLYLVQVIISYLLM  
LVFMNFNYWLCLAVVLGAAAGYFFFGCFKKDAQSDCCP

>D\_moj\_GI24869\_[Ctr1B]

MDLMSMAHDDGHTGAAAHTCPMIMVFHGGHCERILWRSWVAYTVTEFAFSCIAFFAMSFLYEL  
LKFLRVQLVRREARKEAEQLAAEQRRKALGDCNGCSETQLAEIKDKTYWQRIFNMPHIIQTLTTF  
IQLIISYLLMLVFMNFNYWLCLSVILGLSFGYFFFGYVQKDPKDSDCPP

>D\_per\_GL23430\_[Ctr1B]

MDMDHNHGSDSTSTAKSCPMIMVFHAGHCERILWRGWVAAATVTEFVLSALFWFLVSFLYEAL  
KFLRQHLARRVARKERLAEEQRRKNDNPSGCTGCSDTPLAEAREKSYWQRLLDSTHIIQSLNLL  
QIVVSYLLMLIFMTFNYWLCLAVVLGLGFGYFFFGWNKKTTPDESECCP

>D\_pse\_GA20368\_[Ctr1B]

MDMDHNHGSDDSNSTAKSCPMIMVFHAGHCERILWRGWVASTVTEFVLSAIFWFLVSFLYEAL  
KFLRQHLARRVARKERLAEQRRKNDNPSGCTGCSDTPLAETREKTYWQRLLDSTHIIQSLLNLL  
QIVVSYLLMLIFMTFNYWLCLAVVLGLGFGYFFFGWNKKTPESECCP

>D\_sec\_GM23723\_[Ctr1B]

MDHDHDHGSDSSSTAKSCPMIMVFHAGHCERILWRGWVASTVTEFVLSALAIFLVSFLYEALK  
FLRQQLARREARRESEQLAAEQRRKNEAPAAGGCCSETPLAEPREQTYWQRLLASSHIVQSLLN  
LLQIVISYLLMLIFMTFNYWLCLAVILGLGLGYFFFGWNKKNPDESECCP

>D\_sim\_GD15144\_[Ctr1B]

MDHDHDHGSDSTSTAKSCPMIMVFHAGHCERILWRGWVASTVTEFVLSALAIFLVSFLYEALK  
FLRQQLARREARRESEQLAAEQRRKNEAPAAGGCCSETPLAEPREQTYWQRLLASSHIVQSLLN  
LLQIVISYLLMLIFMTFNYWLCLAVILGLGLGYFFFGWNKKNPDESECCP

>D\_vir\_GJ24513\_[Ctr1B]

MDLMTMDHDDHGSESVTAAKSCPMIMVFHGGHCERILWRGWVAATVTEFAFSCIAFFVLSFLY  
ELLKFLREHLIRREARREAEELAAELRQKNSVNDCCGGCSETPLAEIREKTYWQRILNTPHIIQSLL  
NLVQIIISYLLMLVFMNFNYWLCLSVVLGLGVGYFFFGWIKKDPQESECCP

>D\_wil\_GK13179\_[Ctr1B]

MDHNHGSDTSTTSCHSMSMSFHAGYTEIILWNGWTTKTVAEFVLSAIAIFVVSFLYEALKFLRQN  
LMRIEARKLAQRLAEDQRRKNNVSDCCGGCSDTPLADPREKTYWQQLVEYSHIVQSLLNLLQIIVS  
YLLMLIFMTYNYWLCLAVVLGLGVGYFFFGWNKDKAQESECCP

>D\_yak\_GE25868\_[Ctr1B]

MDHDHDHGTDDSTSTAKSCPMIMVFHAGHCERILWRGWVASTVTEFVLSALAIFLVSFLYEALK  
FLRQQLARREARKESERLAAEQRRKNEAPAAGGCCSETPLAEPREQTYWQRLLFASTHIVQSLLN  
LLQIVISYLLMLIFMTFNYWLCLAVILGLGLGYFFFGWNKKNPDESECCP

Non-drosophilid insects: Ctr1B homologs, protein sequences

>A\_aeg\_AAEL013263\_[Ctr1B]

MDHNHGGPDDMEMLCPMKMSFHGGTCEVILFPSWATTKTGQFVGAWIGFFLMALLYEGLKFY  
REILAQKEAEKHCSPGTKRSMRHFMTDKLHILQSLHLIQQVSVSYILMLIVMLFNLWLCLAIVSG  
AAVGYYFFGWIRRSKMDPNECCN

>A\_gam\_AGAP000100\_[Ctr1B]

MDHNHGGPDDMEMLCPMQMSFHAGSCEVILFPSWATTEVGAFVGVAVIGFFLLAFAYEGLKYGR  
ELLHFSKASKRGGEVNDKRTLNRHRLRQALLNRVHIIQTLLHLLQVSVSYLLMLIVMTYNCWFLFL  
AVVCAADYYVFGWVRNSSVDPTENCN

>C\_pip\_CPIJ016468\_[Ctr1B]

MDHNNHGGPDDMEMLCPMQMSFHGGTCEIILFPSWATTEVGQFIGAWIGFFLMAVLYEGLKFL  
YREVLAQRERKPCSEPAEKKSISLLHHLTNKLHIVQSLLHLLQVSVSYVLMMLIIMLFNLWLCLAI  
VTGAALGYIIFGWIRQSTIDANECCN

>A\_mel\_LOC725845\_[Ctr1B]

MHDELTKSPNSSTMSARYILPMSFHIGENEVILFDEWHPVDWQGLGWSMVGVIASIIYEGIKN  
YRDHLYINTTRLWKNKEINNRGTLFLFSKIHFLQTIHVVQLVIGYCLMLIFMTYNIWLCIAVAFGT  
ALGYWLFSDKSNNGSDDCCL

>N\_vit\_LOC100120065\_[Ctr1B]

MSFHWGFGETILFEGWKTDDVGGIVGSMVGVILLGMIYEALKNYREYLNVSNAVHNPKEALSR  
NEAMFSLIHVVQTLQGIQIIVGYFLMFIFMTYNTYL CIAVVAGSMLGYFLFAWKNSKCDISECCS

Drosophilids: Ctr1C homologs, protein sequences

>D\_mel\_Ctr1C

MDHHGVDASEGHVHHHASHGSPPEVPPSSGHEGHHSPEMNHHGNHGEHTKHGHHEGGAHDMS  
MAMFFHTGDSETILFKFWRTESAMALTLSCLLIFMVAVL YEALKFFREWLFSDWRKRLAGGRD  
QYNRPRRYREANYNYNQPTYPPRTNQSGTQVYAYRPRSPSPMPPLQPPGRSSPQAQSSLILTQHT  
HHHVQENTPPAGRTTKLKVFCSGMHILQTFHLVQLVLISFLLMLVFMTFNWLCVAVLLGAGV  
GYYIFCAFRTNVQEHCN

>D\_ana\_GF23301\_[Ctr1C]

MVNRGATYHHGHAVTTSEVHSIANKLGHGHNSHNTMDHDMHSDSNHHHHPMPEPEDSMSHEN  
SAGGHSHHGHDHGTGDGGGHHDMSMSMFFHTGYTETILVKFWRTSTLAIVLSCLAIFMVAVF  
YEALKFFREWLYAKQNKRLAAGKEMKKSSGRVSYNQPTRLPPTMQQGSSQIYVNRPRSPSPMPPL  
RSGTTAANSISNPHAGHNRVHNHPGRGQGRGRRILPEAIPPAQVPCHKVWCSRMLLQTFHLVI  
QVFISFLLMLVFMTFNWLCVAVLLGAGVGYMFCAFSTRIHEHCN

>D\_ere\_GG11899\_[Ctr1C]

MNHHGVDASEGHVHHHGAHVPEPAPPSSAHEGHHSPEMAHHGHHGEHTKHGHHDGEGHHM  
TMAMFFHTGDAETILFKFWRTESAMALTLSCLLIFVFAVL YEALKFFREWLFSDWRKRLAGGRD  
QNNPPRRYREANYNYNQPTYPPRTNPQSGTQIYAYRPRSPMPPLQPPGHSSPQAQSSLILTPHTH  
HHVQESTPPAGRTSKLKVYCSGMHILQTFHLVQLVLISFLLMLVFMTFNWLCVAVLLGAGV  
YYVFCFARTNVQEHCN

>D\_gri\_GH14352\_[Ctr1C]

MDLGYDNGQLYTALSREPRHHPDHHHHDEHHHEPGSTAGSEGDGSPVTRNTHAEPRCGHGGHGGGS  
MIFHFGCTETILFEFWQTKSTDNLLSCLIVFIMAVFYEALKCYREWLLKCEKQRLDGGANPTRH  
FRSAVPIPQRIDAPPPSAQQISVPLTIAAESVLQPPMAVPIGELALSQRYPWDLRHWQFQTLHML  
LQVTISFMMMLIFMTFNVL CIAVVAGAGVGYFIFARRENISDHCN

>D\_moj\_GI10446\_[Ctr1C]

MDLRYDRVPFPTGFTRESRHDHSHEHHEAASSGQAAERQTENPQPEHSCHGSAGHGGSMVFHV  
GNRETILFGFWTTSTTTSLVLSCLIVFIIAVGYEALKCYREWLLKCYKKRQEGGSDRGGTTATQL  
APAPTLIDAYSSPLSPVVLSGVGAGAGADQSQNRPPLTTRVPWLAPIHWYQTLHMLQVTISFL  
LMLIFMTFNWLCIAVVMGAGVGYFIFARSENVS DHCN

>D\_per\_GL13975\_[Ctr1C]

MSLRHDHYGGIEYFQEAALPHPQHGPADKMADDHVGRGHDMPMV FHGGYNETILFKFWQCD  
TRLALAFSCLIFILAILYEALKFFRDWLFRRKRRIQGGYDNYSRNRPNYNYDYRQPHQPM  
QRHLQPHLQPRLQPQPQLQPQQLTGRIQTYVYRPPQVRRPAQTQSPAPTAAPTAAPTSITYFSDG  
ESISTLGLDPTSSSSDQAVPRSASNRSATTTDAQAIQTSDFQAATASDDKSPKTSLSQAWKKLRDL  
ASSASRSGGQGTSTSAAQGVSTANAHTHIRRPGPPGPPGPSRLLAAVESQDTGESFTCDFYLS  
PLHIAQTFHLMLQVLISFLLMLVFMSFNWLCVAVLLGAGMGYFLFFPLCTSVQEHCN



>D\_pse\_GA13809\_[Ctr1C]

MSLRHDHYGGIEYFQEAELPHPQHGPADKMADDHVGRGHDMPMV FHGGYNETILFKFWQCD  
TRLALAFSCLSIFILAILYEALKFFRDWLFRKRKRRIQGGYDNYSPSRNRPNYDYRQPHPQM  
QRHLQPHLQPRLLQPQLQPQLTGRIQTYVYRPPQVRRPVQAQSPAPTAAPTSITYFSDGESIS  
TLGDLPTSSSSDQAVPRSASNRSATADAQAIQTSDFQAATASDDKSPKTSLSQAWKKLGLDASR  
ASRSGGQGTSTSAAGVSTANAHTHIRRPGPPGPPGPSRLLA AVESQDTGESFTCDFYLSPLHIAQ  
TFLHMLQVLISFLLMLVFMSFNWVLCCLAVLLGAGMGYFLFFPLSTSVQEHCN

>D\_sec\_GM12117\_[Ctr1C]

MDHHGVDVSEGHVHHHASHGSPAPAPPSSSHEGHHSPEMTHHGSHGEHTKHGHHEGGGHDMS  
MAMFFHTGDAETILFKFWRTESAMALTLSCLLIFVAVLYEALKFFREWLFSDRRRLAGGRDQ  
YNRPRRYREANYNYNQPTYPPRTNQSGTQIYAYRPRSPSPMPPLQPPGRSSPQAQSSLILTQHTH  
HHVQENTPPAGKTTKLKVYCSGMHILQTLHVLQVLISFLLMLVFMTFNWVLCVAVLLGAGVG  
YYIFCAFRTNVQEHCN

>D\_sim\_GD16719\_[Ctr1C]

MDHHGVDVSEGHVHHHASHGSPAPAPPSSGHEGHHSPEMNHHGNHGEHTKHGHHEGGAHDM  
SMAMFFHTGDAETILFKFWRTESAMALTLSCLLIFVAVLYEALKFFREWLFSDRRLAGGRD  
QYNRPRRYREANYNYNQPTYPPRTNQSGTQIYAYRPRSPSPMPPLQPPGRSSPQAQSSLILTQHT  
HHHVQENTPPAGKTTKLKVYCSGMHILQTLHVLQVLISFLLMLVFMTFNWVLCVAVLLGAGV  
GYYIFCAFRTNVQEHCN

>D\_vir\_GJ10633\_[Ctr1C]

MDLRYNVGRVQTAFTRESRHHHQNHHQGPSPGSGSAAEAGHAETVETRNAQGC GHGGHGG  
SMIFHCSDRETILFKFWTTDSTTSIVLSCLVVFMAILYEALKCYREWLFKCKKRLEGGENRPRS  
ILTQLSSIPSTPISEAALSMAEQFPPLPVAAPTAPENS RAGPAAPWLSPMHWYQTLHMIQVTISF  
LLMLIFMTFNWVLCIAVVLGAGVGYIIFARSENVS DHCN

>D\_wil\_GK13100\_[Ctr1C]

MDIGHEPHTVQPHEHHQDHHEQH HHHHHHDGHAESPSDASEISFKTDHESHYKEHHDMSGHE  
HGHHMSMSFHEGVDETLFKFWHSQTTLVLVLSCVIIFLVAVMYEG LKFYREWLFKCKRRSEG  
GNER YQHYENQQYPPQYPQPTAQTFVFRPRT PATSPRPSKIAPRQSIRTTNPTHVDIPPIFNASAP  
EPSPPDGT PKRKQCSKFKAWFGKFHLFQTFLHMLQVFVSFLLMLVFMTYNWVLCMAVVLGAGF  
GYFIFFAYS DKFYDHCN

>D\_yak\_GE23348\_[Ctr1C]

MNHHGVDASEGHVHHHSHGSAEPAPPTS VHEGHHSHDMSHPGSHGELTKHGHHEGGGHDMS  
MAMFFHTGDAETILFKFWRTESAMALTLSCLLIFVAVLYEALKFFREWLFSDRRLAGGRD  
QYNP RRYREANYNYNQPTYPPRINPQSGTQIYAYRPRAPSPMPPLQPPGPGSPQPHSSLILIP  
HTHQHIQENTPPAGRTSKLKVYCSGMHILQTLHVLQVLISFLLMLVFMTFNWVLCVAVLLGAG  
VGYIIFCAFRTNVQEHCN

# Figure S1

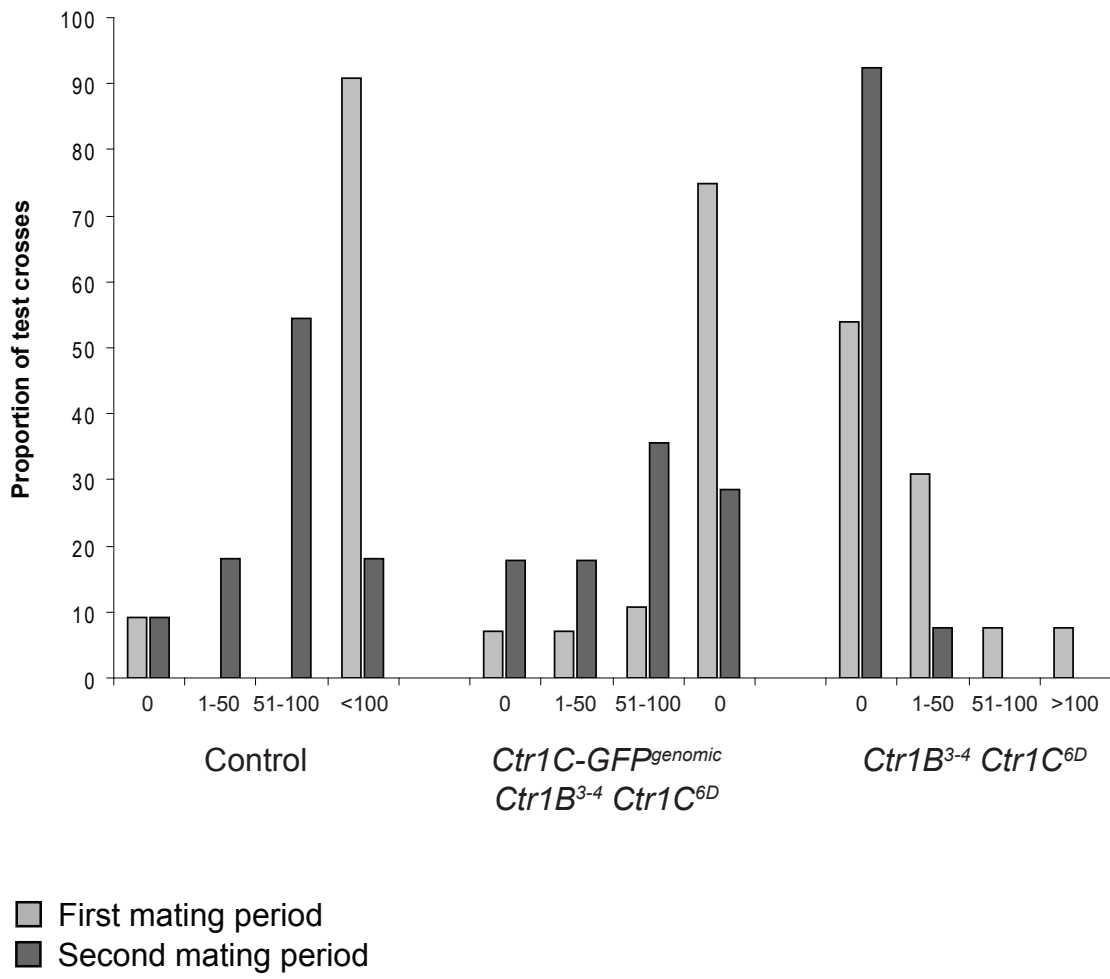





# Figure S2

## C Alignment of human Ctr1 and insect Ctr1A genes

```
A_mel_LOC551217_[Ctr1A]      -----MSH-----NHMAHMMNATNGHSAHGTHAS-HQAIDHLNMHGMNHN 39
N_vit_LOC100122867_[Ctr1A]  -----MAHH-----DHMAHMMAMNTSGSPD--MTG-MDHDHGHMA-NTNH 37
T_cas_LOC660576_[Ctr1A]    -----MEHH-----NHDMH-----EPLDH-----NMHQ 18
A_aeg_AAEL013309_[Ctr1A]   -MDHSEHH-----DYSHQMNHSSDADMMHHGHEGHHGSMESHS---LQDHT 41
A_gam_AGAP002109_[Ctr1A]  -MDHSEHH-----DYSQHANMSSGG--AHAGHTG-HGTVDHS---AHDHT 38
P_hum_PHUM339810_[Ctr1A]  --MDHAGH-----GVSHGDSHVGPVHPHGGDTSRMGPPSHG-----VSS 38
A_pis_LOC100165693_[Ctr1A] -----MSH-----DHHNHN-----HQAIEEN-----HQ 17
D_mel_Ctr1A                --MDHAHHSAPGVLDHSMHHDHVGMHHDHSGIPAATASPMDAASMFLLIPD 48
B_mor_LOC692872_[Ctr1A]   MDEHHEHH-----NMDMGHAGHEHHGIDHSRHHIGHQMPINILLN--SSYN 43
hCtr1                      --MDHSHHMG-----MSYMS-----N 15
                               *
                               .

A_mel_LOC551217_[Ctr1A]    SMDHANM--DHG-SHLTSDTNPCANMGMHGMSTLWVHGGYC-EHVLFESEW 85
N_vit_LOC100122867_[Ctr1A] HMDHGSMSHDHGSAQSSDACSAMSHAMHGMSLWVHGGYC-EKILFETW 85
T_cas_LOC660576_[Ctr1A]   GMGHMGH--DMG-----GTMKPKHDMMSHMMSLWVHGGYC-ETVLFQW 59
A_aeg_AAEL013309_[Ctr1A] -MDQAS--AHAAAG---HSGHAG-MVHHMMSLWVHGGYC-ETILFEQW 82
A_gam_AGAP002109_[Ctr1A] MMDHGADHDDHGAAGGGAASPAAG-MVHHMMSLWVHGGYC-ETILFEQW 85
P_hum_PHUM339810_[Ctr1A] HVDHASH---NHIHETINDSHNGS--HCHGMSLWVHGGYC-ETILFSTW 81
A_pis_LOC100165693_[Ctr1A] HPTESD---SCCSGSEAPASSGQHMMHMMMSLWVHGGYC-ETVLFQW 62
D_mel_Ctr1A              TSDLQASHAGHAAGAHNHGGGSGTGMHMMPLWVHGGYC-ETILFQW 96
B_mor_LOC692872_[Ctr1A]  RIVHNTDMNDNVHTFSGHGDHSS--HNMGMSLWVHGGYC-ETILFQW 89
hCtr1                    STMQPSH---HHPTTSASHSHGGGDSMMMLLWVHGGYC-ETILFQW 61
                               * . * * : * : * * .
                               .

A_mel_LOC551217_[Ctr1A]    KITSISGLIGSMVGMIMAAALYEGLKYYREYLFWKMYNSLQYRSVTMPQE 135
N_vit_LOC100122867_[Ctr1A] QISSVAGLIGSVIGIVIMSALYEGLKYYREYLFWKTYNALQYRSVSMPQE 135
T_cas_LOC660576_[Ctr1A]   KFSTIGGLIGSMIGIFMAALYEGLKYYREYLFWKTYNALQYRAVTLPE 108
A_aeg_AAEL013309_[Ctr1A] KIDSLGSLLSMMLLIFVMAALYEGLKYYREHLEFWKTYNALQYRPVTVTEK 132
A_gam_AGAP002109_[Ctr1A] KIDSLGSLLSMMLLIFVMAALYEGLKYYREHLEFWRTYNALQYRPVTVTEK 135
P_hum_PHUM339810_[Ctr1A] KIDSVGGLIGSMFGLVLAALYEGLKYYREYLFWKTYNSLQYKSVRFGD 131
A_pis_LOC100165693_[Ctr1A] TFSTTGLVYSMIGIFLMLATLYEGLKYYREYLFWKSYNALQYRSVQIPLE 112
D_mel_Ctr1A              HIETVAGLIGSMIAIFLLALMYEGLKYYREYLFWKTYNLLEYRPVTGPQR 146
B_mor_LOC692872_[Ctr1A]  NVTEVGFVGSFFAIFIIALLYEGLKYYRKHLWKTYAGLQYCAVAPPDK 139
hCtr1                    VINTAGEMAGAFVAVFLLAMFYEGLKIARESLLRKSQVSTRYNSMPVPGP 111
                               . . . : : . . . : : * * * * * * : * : * : : : * . . : .
                               .

A_mel_LOC551217_[Ctr1A]    KNVVA-----EDNRVHVMGVEV 152
N_vit_LOC100122867_[Ctr1A] KNVVN-----DDNRVHVMGVEV 152
T_cas_LOC660576_[Ctr1A]   KGVVS-----EDNQIVHVMGVEV 125
A_aeg_AAEL013309_[Ctr1A] SPGN-----GNVANNGLAANGSGD-----EASRVHVMGVEV 164
A_gam_AGAP002109_[Ctr1A] SNGNGVTVAGGTATDDRAGGAGVGDGLNGASGTGTSABEAGRIVHVMGVEV 185
P_hum_PHUM339810_[Ctr1A] KVVES-----SSDGNKIVHVMGVEV 150
A_pis_LOC100165693_[Ctr1A] KGPND-----PVSQVMGKV 126
D_mel_Ctr1A              NPEAPR-----IPSPAAAAPSVPQYVGEV 170
B_mor_LOC692872_[Ctr1A]  GVANIC-----AADEPPIVQPIPHM 159
hCtr1                    NGTIL-----ME 118

A_mel_LOC551217_[Ctr1A]    IHKQP-PTMLSWMHFTQTCLHIVQIVLSYFLMLIFMTYNVWLCAVVLGA 201
N_vit_LOC100122867_[Ctr1A] IHKQP-PTMLSWMHAFQTLHLIIQIILSYFLMLIFMTYNSWLCAGVVLGA 201
T_cas_LOC660576_[Ctr1A]   IHKQP-PTMLSGMHFYQTLHLMIQMVLSYFLMLIFMTYNVWLCLAVVIGA 174
A_aeg_AAEL013309_[Ctr1A] IHKQRP-PTMLSTMHLFQTLHLILQVTLSEFLMLIFMTYNTWLCIAVVLGA 214
A_gam_AGAP002109_[Ctr1A] IHKQP-PTMLSLMHLFQTLHLILQVTLSEFLMLIFMTYNTWLCIAVVLGA 234
P_hum_PHUM339810_[Ctr1A] IHKQP-PSMNLMHGQYQTLQAVQMVLSYFLMLIFMTYNVWLCTAVVLGA 199
A_pis_LOC100165693_[Ctr1A] LLKQPI-PTMFLTHLLQTLHLIVQISISYLLMLIFMTYNVWLCLAVLFGA 176
D_mel_Ctr1A              VHKQP-PSMLSINHLQTLHLVQVTLSEFLMLIFMTYNVWLCLMVVLGA 219
B_mor_LOC692872_[Ctr1A]  LERNV-PTMSTAHAWQTILHGVQVLVSYMSLVFMTYNTWLCIAVVLGS 208
hCtr1                    THKTVGQQLSFLPHLLQTLHLIIQVVISYFLMLIFMTYNTWLCIAVVAAGA 168
                               : * . * * * * : : : : : : * * * * * * : * * * * * :
                               .

A_mel_LOC551217_[Ctr1A]    AIGYFLFGWKKSVIVDVTEHCH 223
N_vit_LOC100122867_[Ctr1A] AIGYFLFGWKKSVIVDVTEHCH 223
T_cas_LOC660576_[Ctr1A]   VGYFLFGWKKSVIVDVTEHCH 196
A_aeg_AAEL013309_[Ctr1A] ALGYFLFGWKKSVIVDVTEHCH 236
A_gam_AGAP002109_[Ctr1A] ALGYFLFGWKKSVIVDV----- 251
P_hum_PHUM339810_[Ctr1A] TIGYFLFGWKKSVVVDVTEHCH 221
A_pis_LOC100165693_[Ctr1A] TLGYFLFGWKKSVVVDVTEHCH 198
D_mel_Ctr1A              AVGYFLFCWKKSVIVDVTEHCH 241
B_mor_LOC692872_[Ctr1A]  ATGYFLFGWRRESVVVDFTEHCH 230
hCtr1                    GTGYFLFSWKKAVVVDITEHCH 190
                               * * * * * * : : : : * *
                               .
```



# Figure S2

## E Alignment of insect Ctr1B genes

```
A_aeg_AAEL013263_[Ctr1B] MDHN--HGGPDDMELCP--MKMSFHGGTCEVILFPSWATTKTGQFVGAW 46
C_pip_CPIJ016468_[Ctr1B] MDHNNHNGGPDDEMELCP--MQMSFHGGTCEIILFPSWATTEVGQFIGAW 48
A_gam_AGAP000100_[Ctr1B] MDHN--HGGPDDMELCP--MQMSFHAGSCEVILFPSWATTEVGAFVGAV 46
D_mel_Ctr1B MDHG--SDDSTSTAKSCP--MIMVFHAGHCERILWRGWVASTVTEFVLSA 46
A_mel_LOC725845_[Ctr1B] MHDDDELTKSPNSSTMSAIFYILFMSFHIENEVILFDEWHHPVDMQQLGWSM 50
N_vit_LOC100120065_[Ctr1B] -----MSFHWGFGETILFEGWKTTDVGGIVGSM 28
                                *  * *  *  *  * * :  *  .  .  :  :
                                *  * *  *  *  * * :  *  .  .  :  :

A_aeg_AAEL013263_[Ctr1B] IGFFLMALLYEGLKFYREILAQKEAEKHCSPGTKR----- 81
C_pip_CPIJ016468_[Ctr1B] IGFFLMAVLYEGLKFYREVLAQRERKPCSEPASEKCSI----- 86
A_gam_AGAP000100_[Ctr1B] IGFFLLAFAYEGLKYGRELLHFSDASKRGGEVNDKRTLFIN----- 86
D_mel_Ctr1B LAIFLVSFLYEALKFLRQQLARREARRASEQLAAEQRRKNEAPAAGGCCS 96
A_mel_LOC725845_[Ctr1B] VGVILIASIYEGIKNYRFDHLYINTRLWKNKEINNR----- 86
N_vit_LOC100120065_[Ctr1B] VGVILLGMIYEALKNYRREYLNVSNAVHNPKEALSRE----- 63
:..:*. **.:* *: *

A_aeg_AAEL013263_[Ctr1B] -----SMRHFMTDKLHILQSLHLIQVSVSYILMLIVMLFNLWLC 121
C_pip_CPIJ016468_[Ctr1B] -----SLIHHLTNKLHIVQSLHLLQVSVSYVLMLIIMLFNLWLC 126
A_gam_AGAP000100_[Ctr1B] -----HLRQALLNRVHIIQTLHLLQVSVSYLLMLIVMTYNCWLF 126
D_mel_Ctr1B EAPLAEPREQTYWQRLFASSHIVQSLNLLQIVISYLLMLIFMTFNYWLC 146
A_mel_LOC725845_[Ctr1B] -----GTLF SKIHFLQTIHVVQLVIGYCLMLIFMTYNIWLC 124
N_vit_LOC100120065_[Ctr1B] -----NEAMFSLIHVVQTLLQGIQIIVGYFLMFIFMTYNTYLC 101
: * . * : : : : : * : * : * : * : * : * : * : * : * : * : *

A_aeg_AAEL013263_[Ctr1B] LAIVSGAAGVGYFFGWIRRSKMDPNECCN 150
C_pip_CPIJ016468_[Ctr1B] LAIVTGAALGYIFGWIRQSTIDANECCN 155
A_gam_AGAP000100_[Ctr1B] LAVVC--AADYYVFGWVRNSSVDPTENCN 153
D_mel_Ctr1B LAVILGLGLGYFFFGWNKKN-PDESECCP 174
A_mel_LOC725845_[Ctr1B] IAVAFGTALGYWLF SW-DKSNNGSDDDCCL 152
N_vit_LOC100120065_[Ctr1B] IAVVAGSMLGYLFAW-KNSKCDISECCS 129
: * : . * : * * . . * : *
```

# Figure S2

## F Alignment of drosophilid Ctr1C genes

```

D_sec_GM12117_[CtrlC]  -----MDHHG--VDVSEGH-----VHHHSHGSPAPAPPSSSGHEGHH-----SP 37
D_sim_GD16719_[CtrlC] -----MDHHG--VDVSEGH-----VHHHSHGSPAPAPPSSSGHEGHH-----SP 37
D_mel_CtrlC           -----MDHHG--VDASEGH-----VHHHSHGSPFPVPPSSSGHEGHH-----SP 37
D_ere_GG11899_[CtrlC] -----MNHHG--VDASEGH-----VHHGHAHVPEPAPPPSAHEGHH-----SP 37
D_yak_GE23348_[CtrlC] -----MNHHG--VDASEGH-----VHHGSHGSAEPAPPTSVHEGHH-----SH 37
D_ana_GF23301_[CtrlC] MVNRRGATYHHGHAVTTSEVHSIANKLGHGHNSHNTMDHDMHSDSNHHHHHPMPPEPDSMSH 60
D_per_GL13975_[CtrlC] -----M-----MSLRHDHYGGIEYFQAEALPHPQ----- 24
D_pse_GA13809_[CtrlC] -----M-----MSLRHDHYGGIEYFQAEALPHPQ----- 24
D_moj_GI10446_[CtrlC] -----MDLRYDRVPPPTGFTRESRHDHSHHEHHEAASS--GQAERQT----- 40
D_vir_GJ10633_[CtrlC] -----MDLRYNVGRVQTAFTRERHSHHQQHNHHQGPSGSGSAEAGH----- 43
D_gri_GH14352_[CtrlC] -----MDLGYDNGQLYALSREPRHHPDHHHHDEHHEPGSTAGSEDDGS----- 43
D_wil_GK13100_[CtrlC] -----MDIGHEPHTVQPEHHQDHEHQHHHHHHHDGHAESPDASEIS----- 43
                                *      :

D_sec_GM12117_[CtrlC]  EMTHHGSHGEHTKKGHHHEGGG-HDMSMAMFFHTGDAETILFKFWRTESAMALTLSCLLIF 96
D_sim_GD16719_[CtrlC]  EMNHHGNHGEHTKKGHHHEGGA-HDMSMAMFFHTGDAETILFKFWRTESAMALTLSCLLIF 96
D_mel_CtrlC           EMNHHGNHGEHTKKGHHHEGGA-HDMSMAMFFHTGDSSETILFKFWRTESAMALTLSCLLIF 96
D_ere_GG11899_[CtrlC]  EMAHHGHHGEHTKKGHHHDGEG-HHMTMAMFFHTGDAETILFKFWRTESAMALTLSCLLIF 96
D_yak_GE23348_[CtrlC]  DMSHPGSHGELTKKGHHHEGGG-HDMSMAMFFHTGDAETILFKFWRTESAMALTLSCLLIF 96
D_ana_GF23301_[CtrlC]  ENSAGGHHSHHGHDHGTGDGGGHHDMMSMAMFFHTGYTETILVKFWRTESTLAIVLSCLAIF 120
D_per_GL13975_[CtrlC]  -----HG PADKMADDHVGRGHDMPP--MVFHGGYNETILFKFWQCDTRLALAFSCLSIF 75
D_pse_GA13809_[CtrlC]  -----HG PADKMADDHVGRGHDMPP--MVFHGGYNETILFKFWQCDTRLALAFSCLSIF 75
D_moj_GI10446_[CtrlC]  ENP-----QPEHSCHGS--AGHGGG--MVFHVGNETILFGFWTTSTTTSLVLSCLIVF 90
D_vir_GJ10633_[CtrlC]  AET-----VETRNAQCGHGGHGGG--MIFHCSRETILFKFWTTDSTTSIVLSCLVVF 95
D_gri_GH14352_[CtrlC]  PVT-----RNTHAEPRCGHGGHGGG--MIFHFGCTETILFEFWQTKSTDNLLLSCLIVF 95
D_wil_GK13100_[CtrlC]  FKTDHESHYKEHHDEMSGHEHGHMMS--MSFHEGVDETILFKFWSQTTLVLVLSCVIIF 101
                                * . * * * . * * * * . * * * * *
                                : : : : : * : * : *

D_sec_GM12117_[CtrlC]  VVAVLYEALKFFREWLF SWDRRLAGGRDQYNRPRRYREANYNYN-----QPTY 145
D_sim_GD16719_[CtrlC]  VVAVLYEALKFFREWLF SWDRKRLAGGRDQYNRPRRYREANYNYN-----QPTY 145
D_mel_CtrlC           MVAVLYEALKFFREWLF SWDRKRLAGGRDQYNRPRRYREANYNYN-----QPTY 145
D_ere_GG11899_[CtrlC]  VFAVLYEALKFFREWLF AWRDRKRLAGGRDQNNPPRRYREANYNYN-----QPTY 145
D_yak_GE23348_[CtrlC]  VFAVLYEALKFFREWLF AWRDRKRLAGGRDQYNPPRRYREANYNYN-----QPTY 145
D_ana_GF23301_[CtrlC]  MVAVFYEALKFFREWLYAKQNKRLAAGKEMKKSSGR-----VSYN-----QPTR 164
D_per_GL13975_[CtrlC]  ILAILEALKFFRDWLFRRKRRRIQGGYDNYSPSRNRPYNYDYRQPHQPQRHLQPHL 135
D_pse_GA13809_[CtrlC]  ILAILEALKFFRDWLFRRKRRRIQGGYDNYSPSRNRPYNYDYRQPHQPQRHLQPHL 135
D_moj_GI10446_[CtrlC]  IIAVGYEALKCYREWLLKCKYKRRQEGGSD----- 119
D_vir_GJ10633_[CtrlC]  IMAILEALKCYREWLLKCNKRRLEGGEN----- 124
D_gri_GH14352_[CtrlC]  IMAVFYEALKCYREWLLKCKEQRLDGGANPTRHF----- 129
D_wil_GK13100_[CtrlC]  LVAVMYEGLKFYREWLFKKCKRRSEGGNERYQHYENQQYPPQYPQPT-----AQTF 152
                                : * : ** : * : * : : * : * : *

D_sec_GM12117_[CtrlC]  PPRTNQQ-----SGTQIYAYRP--RSPSMP--PLQP----- 173
D_sim_GD16719_[CtrlC]  PPRTNQQ-----SGTQIYAYRP--RSPSMP--PLQP----- 173
D_mel_CtrlC           PPRTNQQ-----SGTQIYAYRP--RSPSMP--PLQP----- 173
D_ere_GG11899_[CtrlC]  PPRTNPQ-----SGTQIYAYRP--RSPMP--PLQP----- 173
D_yak_GE23348_[CtrlC]  PPRINPQ-----SGTQIYAYRP--RAPSMPPLQQPLQP----- 177
D_ana_GF23301_[CtrlC]  LPPTMQQ-----GSSQIYVNRP--RSPSMP--PLRSG----- 192
D_per_GL13975_[CtrlC]  QPRLQPQPQLQPQPQLTGRIQTYVYRPPQVRRPAQTQS PAPTAAPTAPTSITYFSDGES 195
D_pse_GA13809_[CtrlC]  QPRLQPQPQLQPQPQLTGRIQTYVYRPPQVRRPVQAQSPAPTAAAP---TSITYFSDGES 191
D_moj_GI10446_[CtrlC]  --RGTT-----ATQLAPAP-----TLIDA-----YSSP----- 141
D_vir_GJ10633_[CtrlC]  --RPSI-----LTQLSSIPS-----TPISE-----AALS----- 147
D_gri_GH14352_[CtrlC]  --RSVP-----IPQRIDAPP-----PSAQQ-----ISVP----- 152
D_wil_GK13100_[CtrlC]  VFRPRT-----ATSPRPSKI-----APRQS-----IRTTN----- 178

```



# Figure S2

## G Alignment of drosophilid Ctr1C genes (continued)

```

D_sec_GM12117_[CtrlC] -----
D_sim_GD16719_[CtrlC] -----
D_mel_CtrlC -----
D_ere_GG11899_[CtrlC] -----
D_yak_GE23348_[CtrlC] -----
D_ana_GF23301_[CtrlC] -----
D_per_GL13975_[CtrlC] ISTLGDLP TSSSSDQAVPR SASNRSAT TDAQAIQTSDFQAATASDDKSPKTS LISQAWKK 255
D_pse_GA13809_[CtrlC] ISTLGDLP TSSSSDQAVPR SASNRSAT ADAQAIQTSDFQAATASDDKSPKTS LISQAWKK 251
D_moj_GI10446_[CtrlC] -----
D_vir_GJ10633_[CtrlC] -----
D_gri_GH14352_[CtrlC] -----
D_wil_GK13100_[CtrlC] -----

```

```

D_sec_GM12117_[CtrlC] -----GRSSPQAQSS LILTQH THHH-----VQENTPPAG 202
D_sim_GD16719_[CtrlC] -----GRSSPQAQSS LILTQH THHH-----VQENTPPAG 202
D_mel_CtrlC -----GRSSPQAQSS LILTQH THHH-----VQENTPPAG 202
D_ere_GG11899_[CtrlC] -----GHSSPQAQSS LILTPH THHH-----VQESTPPAG 202
D_yak_GE23348_[CtrlC] -----PGSPQPHSS LILIPH THQH-----IQENTPPAG 206
D_ana_GF23301_[CtrlC] -----TTAANSISN PHAGHNRVHNHPGFGQG-----RGRRLPEAIPPA- 231
D_per_GL13975_[CtrlC] LRLDASSASRSGGQGTSTSAAQGVSTANAH THIRRP GPPGPPGPPGSRLLAAVESQDTG 315
D_pse_GA13809_[CtrlC] LGLDASRASRSGGQGTSTSAAQGVSTANAH THIRRP GPPGPPGPPGSRLLAAVESQDTG 308
D_moj_GI10446_[CtrlC] -----LSPVVL SGGV GAG-----ADQSQNQR P 164
D_vir_GJ10633_[CtrlC] -----MAEQFP PPLPVAAP-----TAP-ENSR- 168
D_gri_GH14352_[CtrlC] -----LTIAAESV LQPPMA-----VPIGELA- 174
D_wil_GK13100_[CtrlC] -----PTHVDIPPI FHNASAPEPS-----PPDGTPKRK 206

```

```

D_sec_GM12117_[CtrlC] KTTKLVKYCSGMHILQ TLLHVLQV LISFL LMLVFMTFN VWLCVAVLLGAGVGY IFCAFR 262
D_sim_GD16719_[CtrlC] KTTKLVKYCSGMHILQ TFLHVLQV LISFL LMLVFMTFN VWLCVAVLLGAGVGY IFCAFR 262
D_mel_CtrlC RTTKLVKYCSGMHILQ TFLHVLQV LISFL LMLVFMTFN VWLCVAVLLGAGVGY IFCAFR 262
D_ere_GG11899_[CtrlC] RTSKLVKYCSGMHILQ TFLHVLQV LISFL LMLVFMTFN VWLCVAVLLGAGVGY VFCAFR 262
D_yak_GE23348_[CtrlC] RTSKLVKYCSGMHILQ TFLHVLQV LISFL LMLVFMTFN VWLCVAVLLGAGVGY IFCAFR 266
D_ana_GF23301_[CtrlC] QVPCHKVWCSRMLLQ TFLHVIQV LISFL LMLVFMTFN VWLCVAVLLGAGVGY MFCAFS 291
D_per_GL13975_[CtrlC] ESFTCDFYLSPLHIAQT FLHMLQV LISFL LMLVFMSFN VWLCVAVLLGAGMGY FFFFPLC 375
D_pse_GA13809_[CtrlC] ESFTCDFYLSPLHIAQT FLHMLQV LISFL LMLVFMSFN VWLCVAVLLGAGMGY FFFFPLS 368
D_moj_GI10446_[CtrlC] PLTTRVPWLAPIHWYQT LLHMLQV TISFL LMLIFMTFN VWLCIAVVMGAGVGY IFFARS 224
D_vir_GJ10633_[CtrlC] -AGPAAPWLSPMHWYQT LLHMIQV TISFL LMLIFMTFN VWLCIAVVLGAGVGY IFFARS 227
D_gri_GH14352_[CtrlC] -LSQRYPWLDLRHWFQT LLHMLQV TISFMMMLIFMTFN VVLYCIAVVMGAGVGY IFFARR 233
D_wil_GK13100_[CtrlC] QCSKFKAWFGKFLHQT FLHMLQV FVSL LMLVFMTYFN VWLCMAVVLGAGGY IFFAYS 266

```

```

: * **:*:*:*:* **:*:*:*:* **:*:*:*:* **:*:*:*:*

```

```

D_sec_GM12117_[CtrlC] TNVQEH CN 270
D_sim_GD16719_[CtrlC] TNVQEH CN 270
D_mel_CtrlC TNVQEH CN 270
D_ere_GG11899_[CtrlC] TNVQEH CN 270
D_yak_GE23348_[CtrlC] TNVQEH CN 274
D_ana_GF23301_[CtrlC] TRIHEHCN 299
D_per_GL13975_[CtrlC] TSVQEH CN 383
D_pse_GA13809_[CtrlC] TSVQEH CN 376
D_moj_GI10446_[CtrlC] ENVSDHCN 232
D_vir_GJ10633_[CtrlC] ENVSDHCN 235
D_gri_GH14352_[CtrlC] ENISDHCN 241
D_wil_GK13100_[CtrlC] DKFYDHCN 274

```

```

:***

```
